# Supplementary material for: Inflammation-Based Scores as a Common Tool for Prognostic Assessment in Heart Failure or Cancer
Source: PubMed Central journal article supplement (PMC8569110; doi:10.3389/fcvm.2021.725903), 2021-10-22
Supplement: Image_1.pdf [file Image_1.pdf]

**Supplementary Material**

**Supplemental Figure S1. Kaplan-Meier estimates for overall survival according to the disease entity heart failure or treatment naïve cancer.** Curves were compared by the log-rank test.

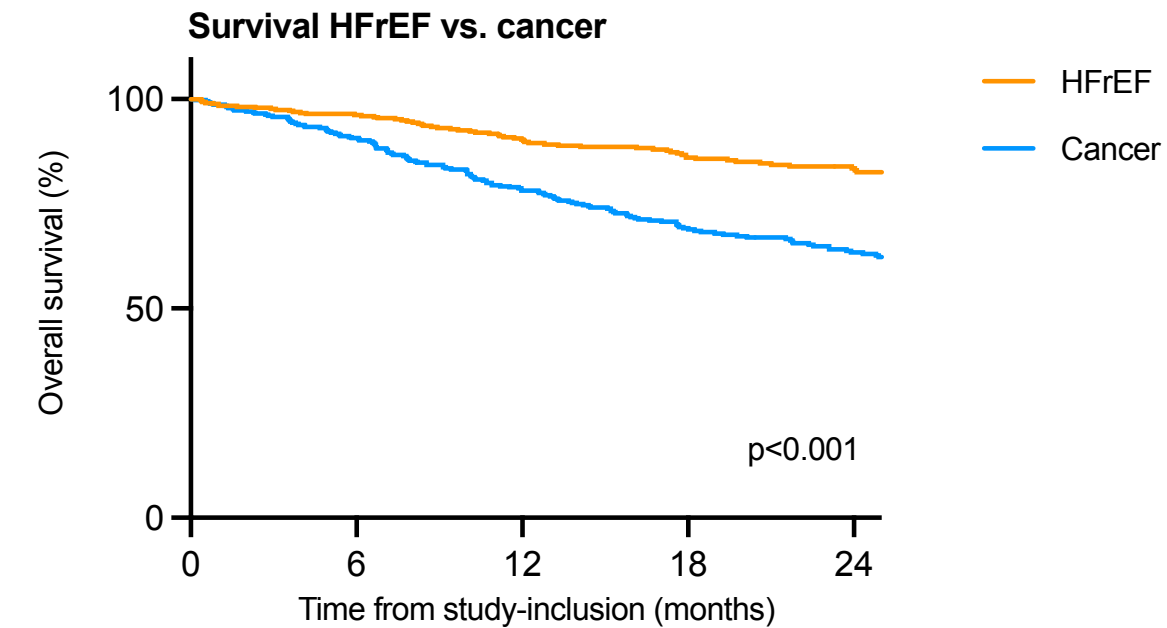

| No. of patients at risk |     |     |     |     |     |
|-------------------------|-----|-----|-----|-----|-----|
| HFrEF                   | 443 | 381 | 320 | 264 | 176 |
| Cancer                  | 375 | 339 | 293 | 220 | 176 |
