# Supplementary material for: Inflammation-Based Scores as a Common Tool for Prognostic Assessment in Heart Failure or Cancer
Source: PubMed Central journal article supplement (PMC8569110; doi:10.3389/fcvm.2021.725903), 2021-10-22
Supplement: Table_1.pdf [file Table_1.pdf]

## *Supplementary Material*

### 1 **Supplementary Table S1. Tumor entities of treatment-naïve cancer patients (n=375)**

Counts are given as numbers and percentages.

|                                     | <b>Cancer patients (n=375)</b> |
|-------------------------------------|--------------------------------|
| <b>Tumor entity</b>                 |                                |
| Breast cancer, n (%)                | 109 (29.1)                     |
| Lung cancer, n (%)                  | 61 (16.3)                      |
| Gastrointestinal tumors, n (%)      | 52 (13.9)                      |
| Myelodysplastic malignancies, n (%) | 47 (12.5)                      |
| ENT-tumor, n (%)                    | 32 (8.5)                       |
| Brain tumor, n (%)                  | 22 (5.9)                       |
| Myeloproliferative neoplasia, n (%) | 12 (3.2)                       |
| Esophageal cancer, n (%)            | 9 (2.4)                        |
| Sarcoma, n (%)                      | 7 (1.9)                        |
| Neuroendocrine tumor, n (%)         | 4 (1.1)                        |
| Renal cell carcinoma, n (%)         | 4 (1.1)                        |
| Mesothelioma, n (%)                 | 3 (0.8)                        |
| Prostate cancer, n (%)              | 2 (0.5)                        |
| Skin cancer, n (%)                  | 2 (0.5)                        |
| Urogenital tumors, n (%)            | 2 (0.5)                        |
| Thymoma, n (%)                      | 1 (0.3)                        |
| Other, n (%)                        | 6 (1.6)                        |

ENT – ear, nose, throat; Myelodysplastic malignancies – hematological malignancies with abnormal differentiation of myeloid or lymphoid cell lines (e.g. AML, ALL, lymphomas, multiple myeloma); Myeloproliferative neoplasia – hematologic neoplasia with normal cell differentiation (e.g. essential thrombocytosis, polycythemia vera, myelofibrosis).
