# Supplementary material for: Inflammation-Based Scores as a Common Tool for Prognostic Assessment in Heart Failure or Cancer
Source: PubMed Central journal article supplement (PMC8569110; doi:10.3389/fcvm.2021.725903), 2021-10-22
Supplement: Table_2.pdf [file Table_2.pdf]

## *Supplementary Material*

**Supplementary Table S2. Association of inflammatory scores with outcome in stable HFrEF and treatment naïve cancer patients.**

**2A. HFrEF (n=443)**

| Score | Adj.HR <sup>a)</sup> | p-value      | Adj.HR <sup>b)</sup> | p-value          | Adj.HR <sup>c)</sup> | p-value          | Adj HR <sup>d)</sup> | p-value          |
|-------|----------------------|--------------|----------------------|------------------|----------------------|------------------|----------------------|------------------|
| NLR   | 1.03 (0.95 – 1.11)   | 0.514        | 1.04 (0.98-1.11)     | 0.166            | 1.04 (0.98 – 1.03)   | 0.177            | 1.05 (0.99-1.12)     | 0.088            |
| MLR   | 1.21 (1.11 – 1.32)   | 0.075        | 1.08 (1.01-1.15)     | <b>0.017</b>     | 1.07 (1.01 – 1.15)   | <b>0.033</b>     | 1.10 (1.03-1.17)     | <b>0.006</b>     |
| PLR   | 1.07 (0.99 – 1.15)   | 0.306        | 1.31 (1.04-1.66)     | <b>0.024</b>     | 1.31 (1.05 – 1.62)   | <b>0.015</b>     | 1.26 (1.00-1.004)    | <b>0.047</b>     |
| PNI   | 0.89 (0.80 – 0.98)   | <b>0.017</b> | 0.83 (0.75-0.91)     | <b>&lt;0.001</b> | 0.82 (0.73 – 0.91)   | <b>&lt;0.001</b> | 0.84 (0.76-0.92)     | <b>&lt;0.001</b> |

**2B. Cancer (n=375)**

| Score | Adj.HR <sup>e)</sup> | p-value      | Adj.HR <sup>e)</sup> | p-value      | Adj HR <sup>d)</sup> | p-value          |
|-------|----------------------|--------------|----------------------|--------------|----------------------|------------------|
| NLR   | 1.03 (1.01 – 1.05)   | <b>0.007</b> | 1.03 (1.00 – 1.05)   | <b>0.025</b> | 1.03 (1.01-1.06)     | <b>0.010</b>     |
| MLR   | 1.04 (1.01 – 1.07)   | <b>0.004</b> | 1.05 (1.01 – 1.08)   | <b>0.005</b> | 1.06 (1.03-1.10)     | <b>&lt;0.001</b> |
| PLR   | 1.06 (1.03 – 1.12)   | <b>0.013</b> | 1.05 (0.99 – 1.11)   | 0.058        | 1.01 (0.99-1.09)     | 0.156            |
| PNI   | 0.94 (0.89 – 0.99)   | <b>0.024</b> | 0.94 (0.89 – 0.99)   | <b>0.030</b> | 0.94 (0.89-0.99)     | <b>0.028</b>     |

a) NT-proBNP

b) NYHA

c) Physical status confounder model: Sex, age, BMI

d) Laboratory confounder model: creatinine, LDH, gamma-GT

e) Tumor stage (n=348; solid tumors only)
